# Supplementary material for: Efficacy and Safety of Diacerein in Patients With Inadequately Controlled Type 2 Diabetes: A Randomized Controlled Trial
Source: Oxford University Press journal article supplement (doi:10.2337/dc17-0374), 2017-08-17
Supplement: dc170374supplementarydata.pdf [file dc170374supplementarydata.pdf]

## SUPPLEMENTARY DATA

**Title:** Efficacy and Safety of Diacerein in Patients with Inadequately Controlled Type 2 Diabetes: a Randomized Controlled Trial.

**Authors:** Claudia R L Cardoso, MD, PhD; Nathalie C Leite, MD, PhD; Fernanda O Carlos; Andréia A Loureiro; Bianca B Viegas; Gil F Salles, MD, PhD.

**Content:** Supplemental Tables S1 and S2.

**Supplementary Table S1.** Cumulative number of participants by treatment group who either increased or decreased concomitant diabetes treatment at each time point of the study.

|           | 12 <sup>th</sup> week | 24 <sup>th</sup> week | 36 <sup>th</sup> week | 48 <sup>th</sup> week |
|-----------|-----------------------|-----------------------|-----------------------|-----------------------|
| Placebo   |                       |                       |                       |                       |
| Increase  | 2                     | 7                     | 9                     | 10                    |
| Decrease  | 2                     | 2                     | 3                     | 4                     |
| Diacerein |                       |                       |                       |                       |
| Increase  | 1                     | 1                     | 2                     | 4                     |
| Decrease  | 3                     | 6                     | 7                     | 7                     |

SUPPLEMENTARY DATA

**Supplementary Table S2.** Adverse events occurring in 5% or more of the participants, according to treatment group.

| Adverse event          | All participants<br>(n=84) | Placebo<br>(n=41) | Diacerein<br>(n=43) | p-value |
|------------------------|----------------------------|-------------------|---------------------|---------|
| Diarrhea, n (%)        | 35 (42%)                   | 7 (17%)           | 28 (65%)            | <0.001  |
| Nausea/vomiting, n (%) | 12 (14%)                   | 2 (5%)            | 10 (23%)            | 0.027   |
| Abdominal pain, n (%)  | 5 (6%)                     | 1 (2%)            | 4 (9%)              | 0.36    |
| Headache, n (%)        | 5 (6%)                     | 3 (7%)            | 2 (5%)              | 0.67    |
| Dizziness, n (%)       | 4 (5%)                     | 2 (5%)            | 2 (5%)              | -----   |
